# Supplementary material for: The first synthesis and cytostatic activity of novel 6-(fluoromethyl)purine bases and nucleosides
Source: Royal Society of Chemistry journal article supplement (doi:10.1039/b508122j), 2005-01-01

# Supplementary Material (ESI) for Organic & Biomolacular Chemistry  
# This journal is © The Royal Society of Chemistry 2005

**The First Synthesis and Cytostatic Activity of Novel 6-(Fluoromethyl)purine Bases and Nucleosides**

Peter Šilhár, Radek Pohl, Ivan Votruba and Michal Hocek\*

*Centre for New Antivirals and Antineoplastics, Institute of Organic Chemistry and Biochemistry,  
Academy of Sciences of the Czech Republic, Flemingovo nam. 2, CZ-16610 Prague 6, Czech Republic  
hocek@uochb.cas.cz*

**Electronic Supplementary Information**

Copies of <sup>1</sup>H NMR spectra of the title 6-(fluoromethyl)purines **4**

**9-benzyl-6-(fluoromethyl)purine (4a) in CDCl<sub>3</sub>**

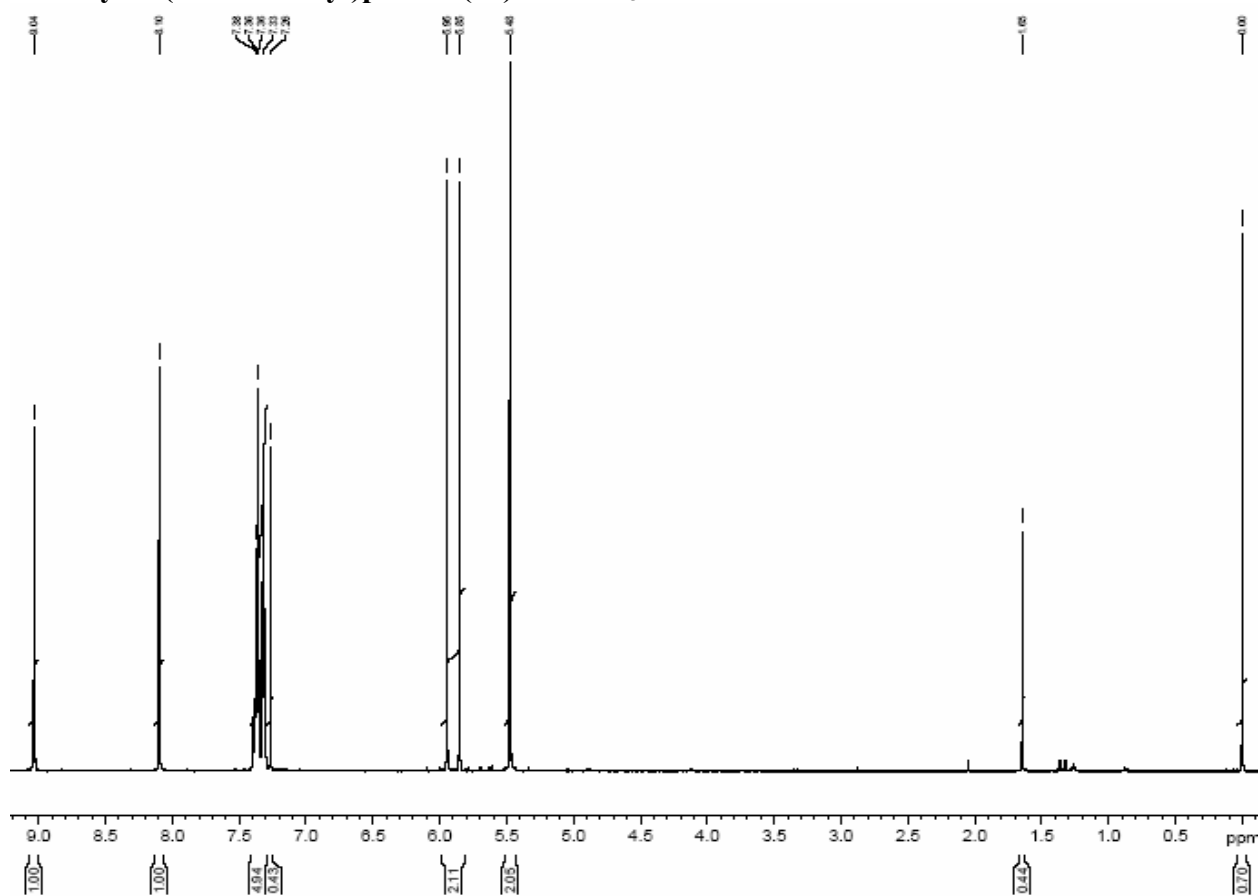

**6-(Fluoromethyl)-9H-purine (4e) in CD<sub>3</sub>OD**

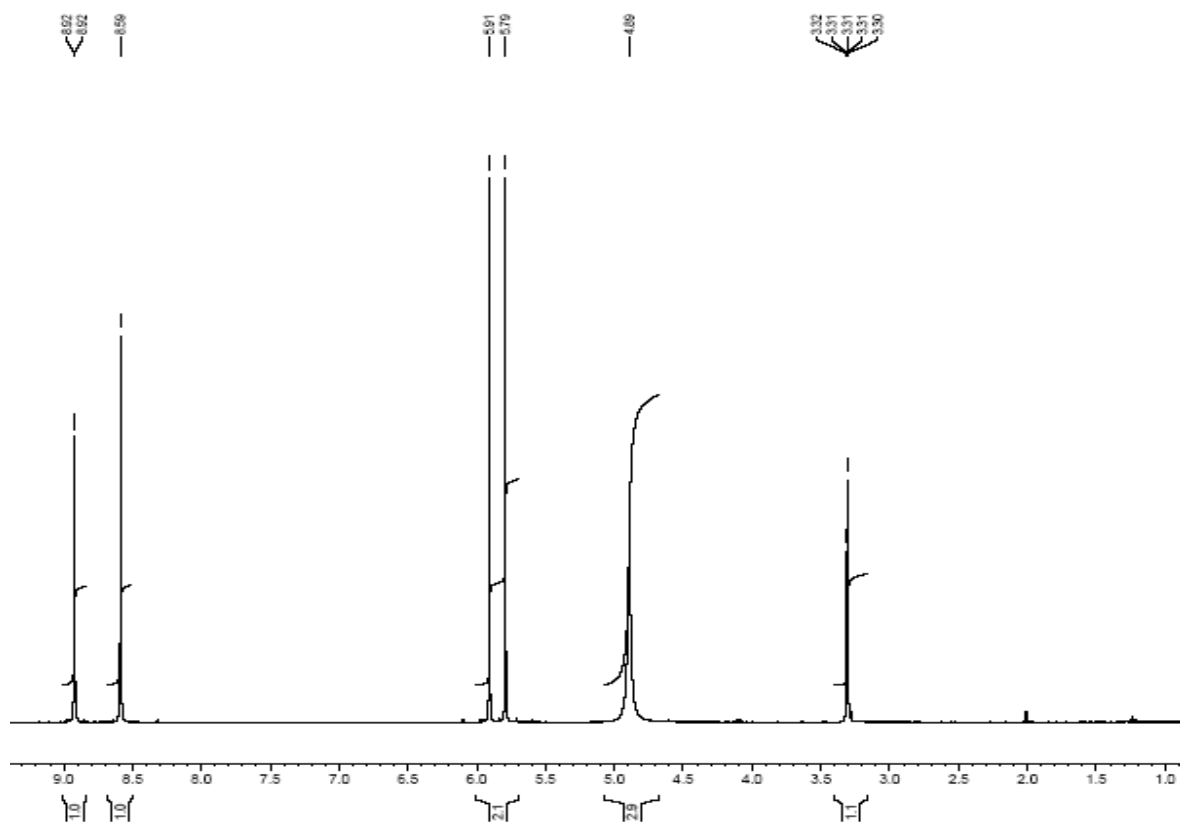

**6-(Fluoromethyl)-9-( $\beta$ -D-ribofuranosyl)purine (4f) in DMSO- $d_6$**

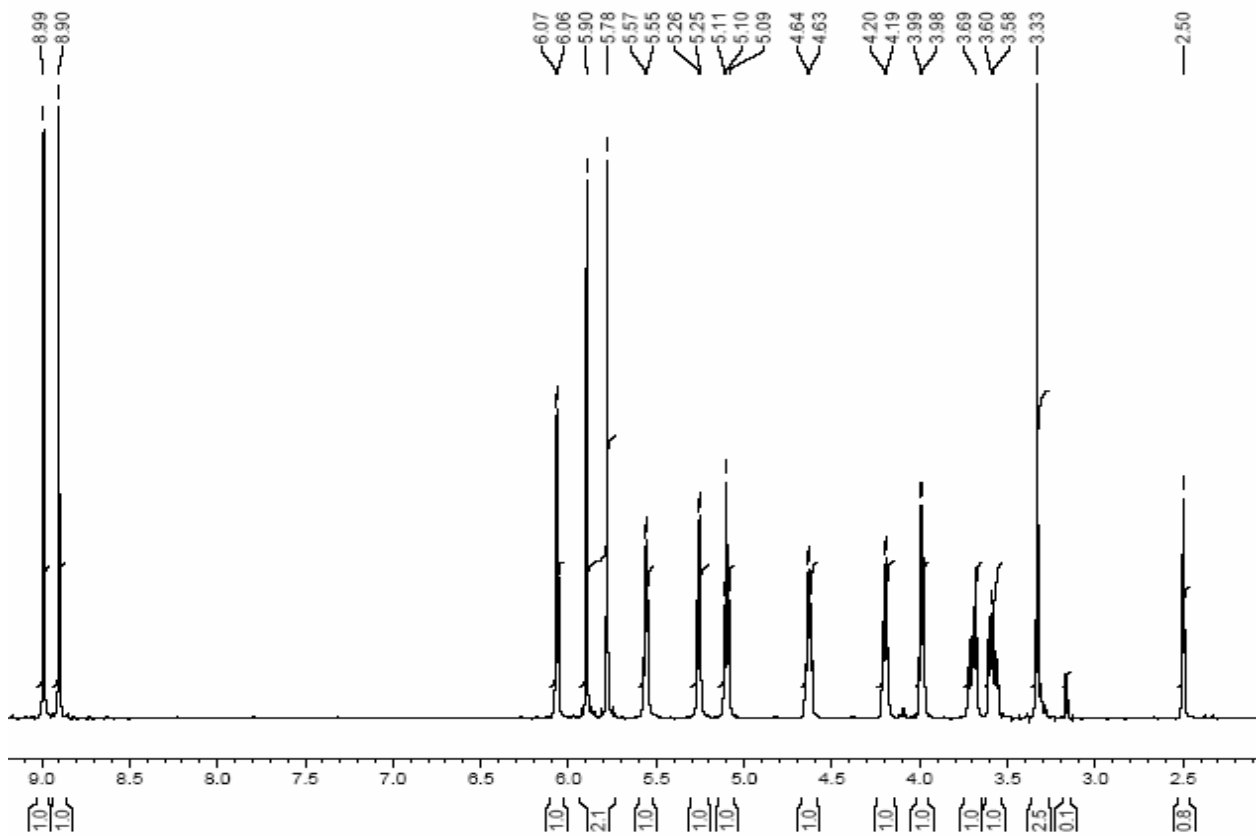

**6-(Fluoromethyl)-9-(2-deoxy- $\beta$ -D-erythro-pentofuranosyl)purine (4g) in DMSO- $d_6$**

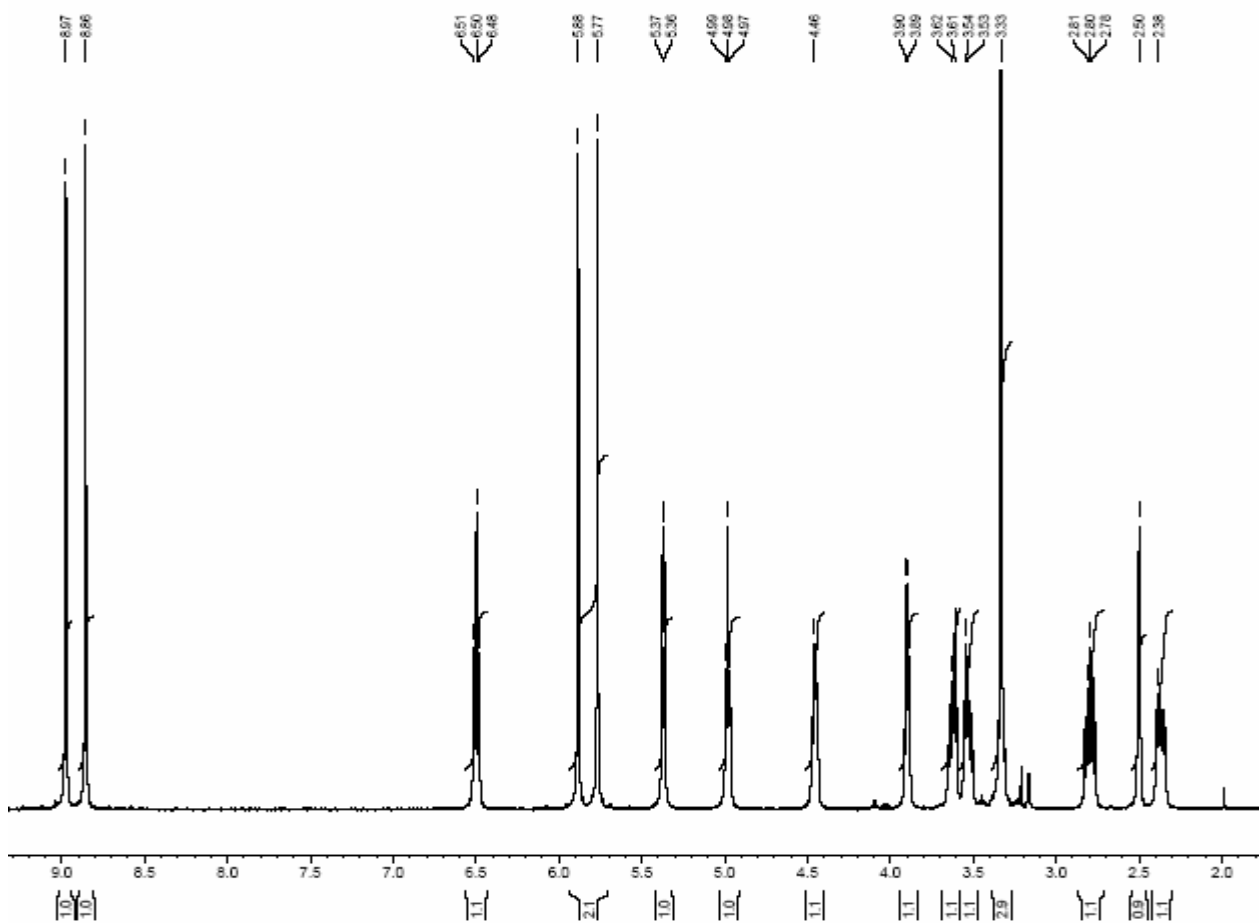

Supplement: b508122j.pdf [file b508122j.pdf]
